# Supplementary material for: Fusarium sporotrichioides Produces Two HT-2-α-Glucosides on Rice
Source: MDPI journal article supplement (doi:10.3390/toxins16020099), 2024-02-10

**bimm-502-ht2-toxinglucoside**  
**T = 323 K**

Current Data Parameters  
NAME bimm-502-ht2-toxinglucoside  
EXPNO 3  
PROCNO 1

F2 - Acquisition Parameters  
Date\_ 20231025  
Time 16.06  
INSTRUM spect  
PROBHD 5 mm CPBBO BB  
PULPROG zg30  
TD 32768  
SOLVENT MeOD  
NS 16  
DS 0  
SWH 7211.539 Hz  
FIDRES 0.220079 Hz  
AQ 2.2719147 sec  
RG 45.2  
DW 69.333 usec  
DE 10.00 usec  
TE 323.0 K  
D1 1.00000000 sec  
TD0 1

===== CHANNEL f1 =====  
SFO1 400.1330010 MHz  
NUC1 1H  
P1 11.77 usec  
PLW1 9.00000000 W

F2 - Processing parameters  
SI 32768  
SF 400.1300075 MHz  
WDW GM  
SSB 0  
LB -0.30 Hz  
GB 0.3  
PC 1.00

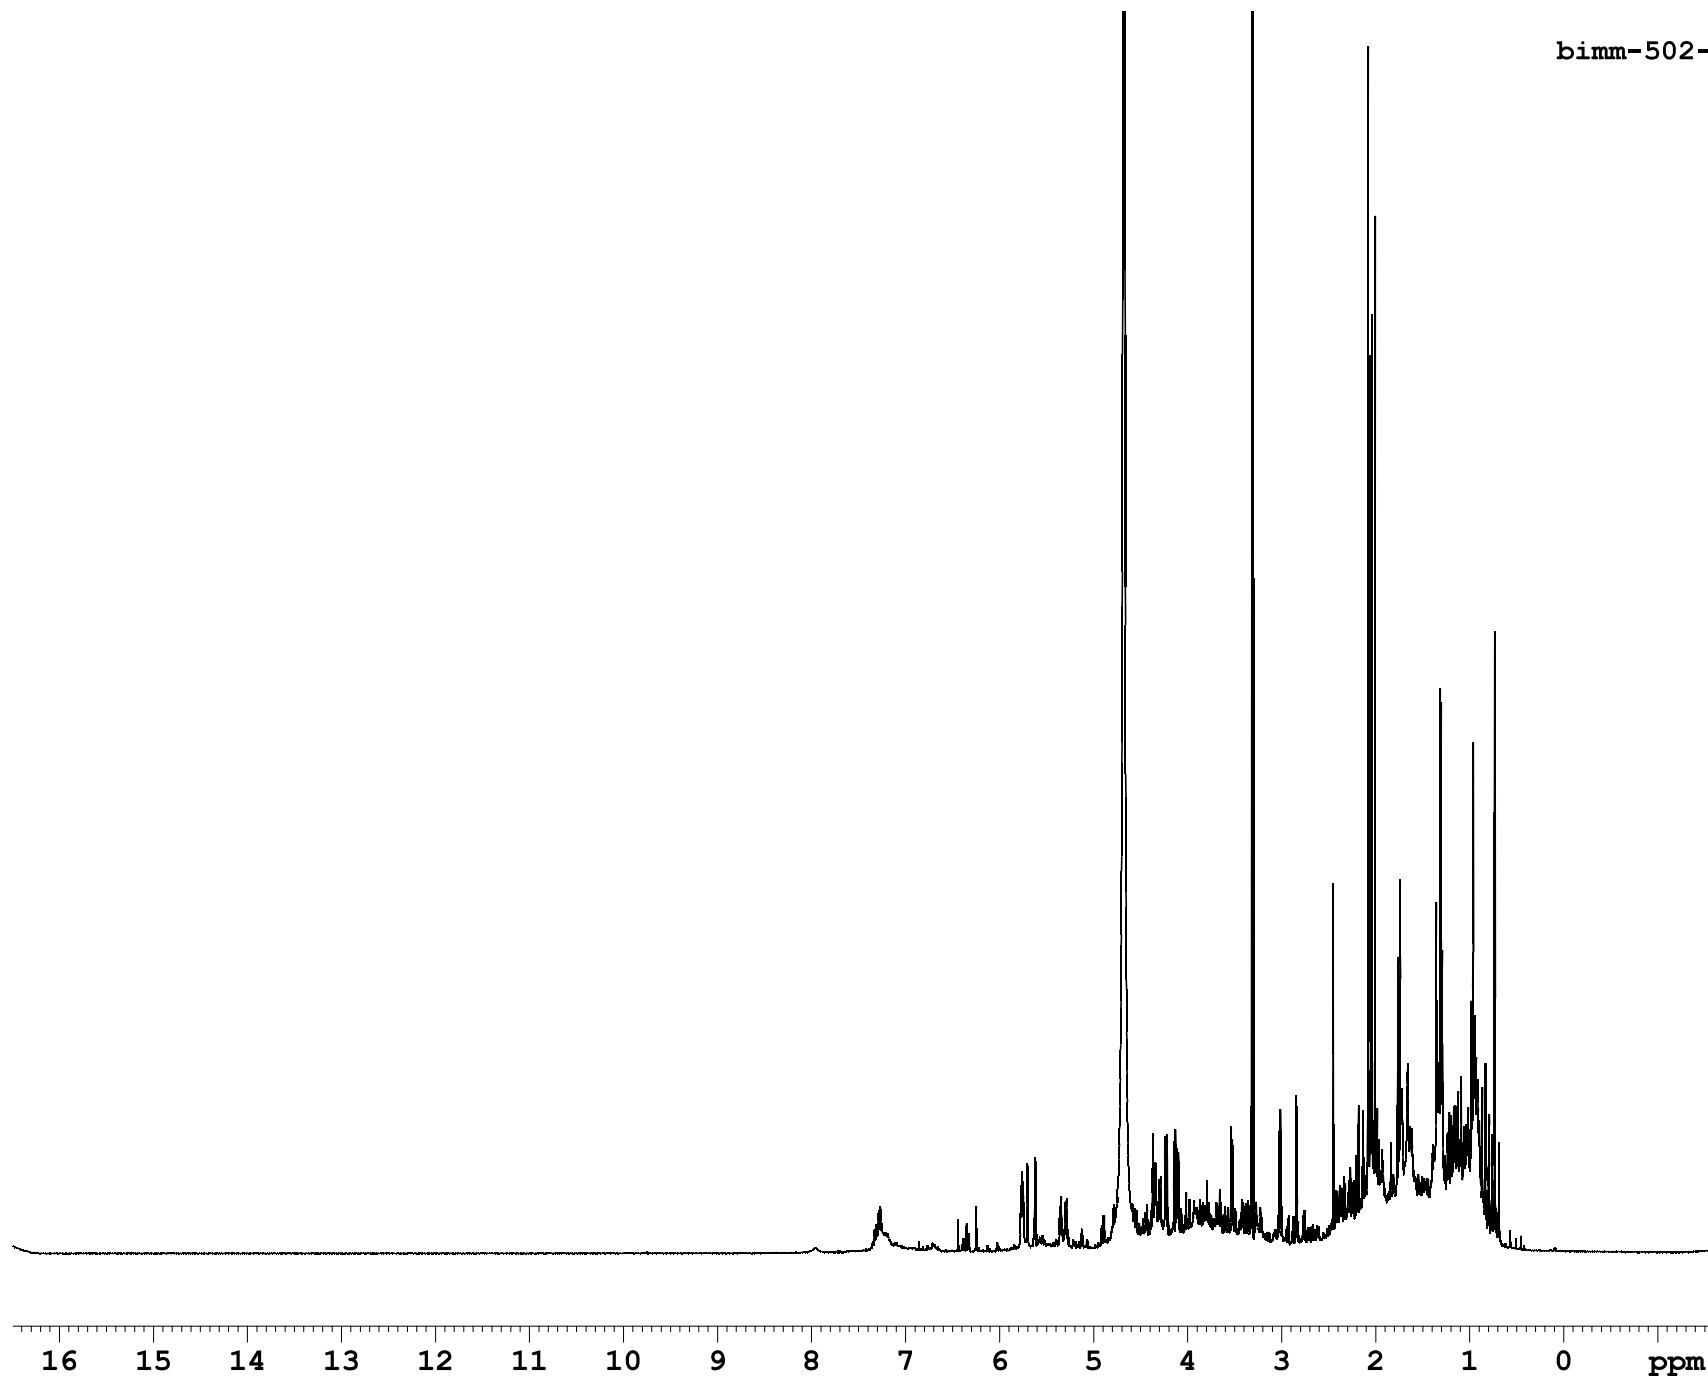

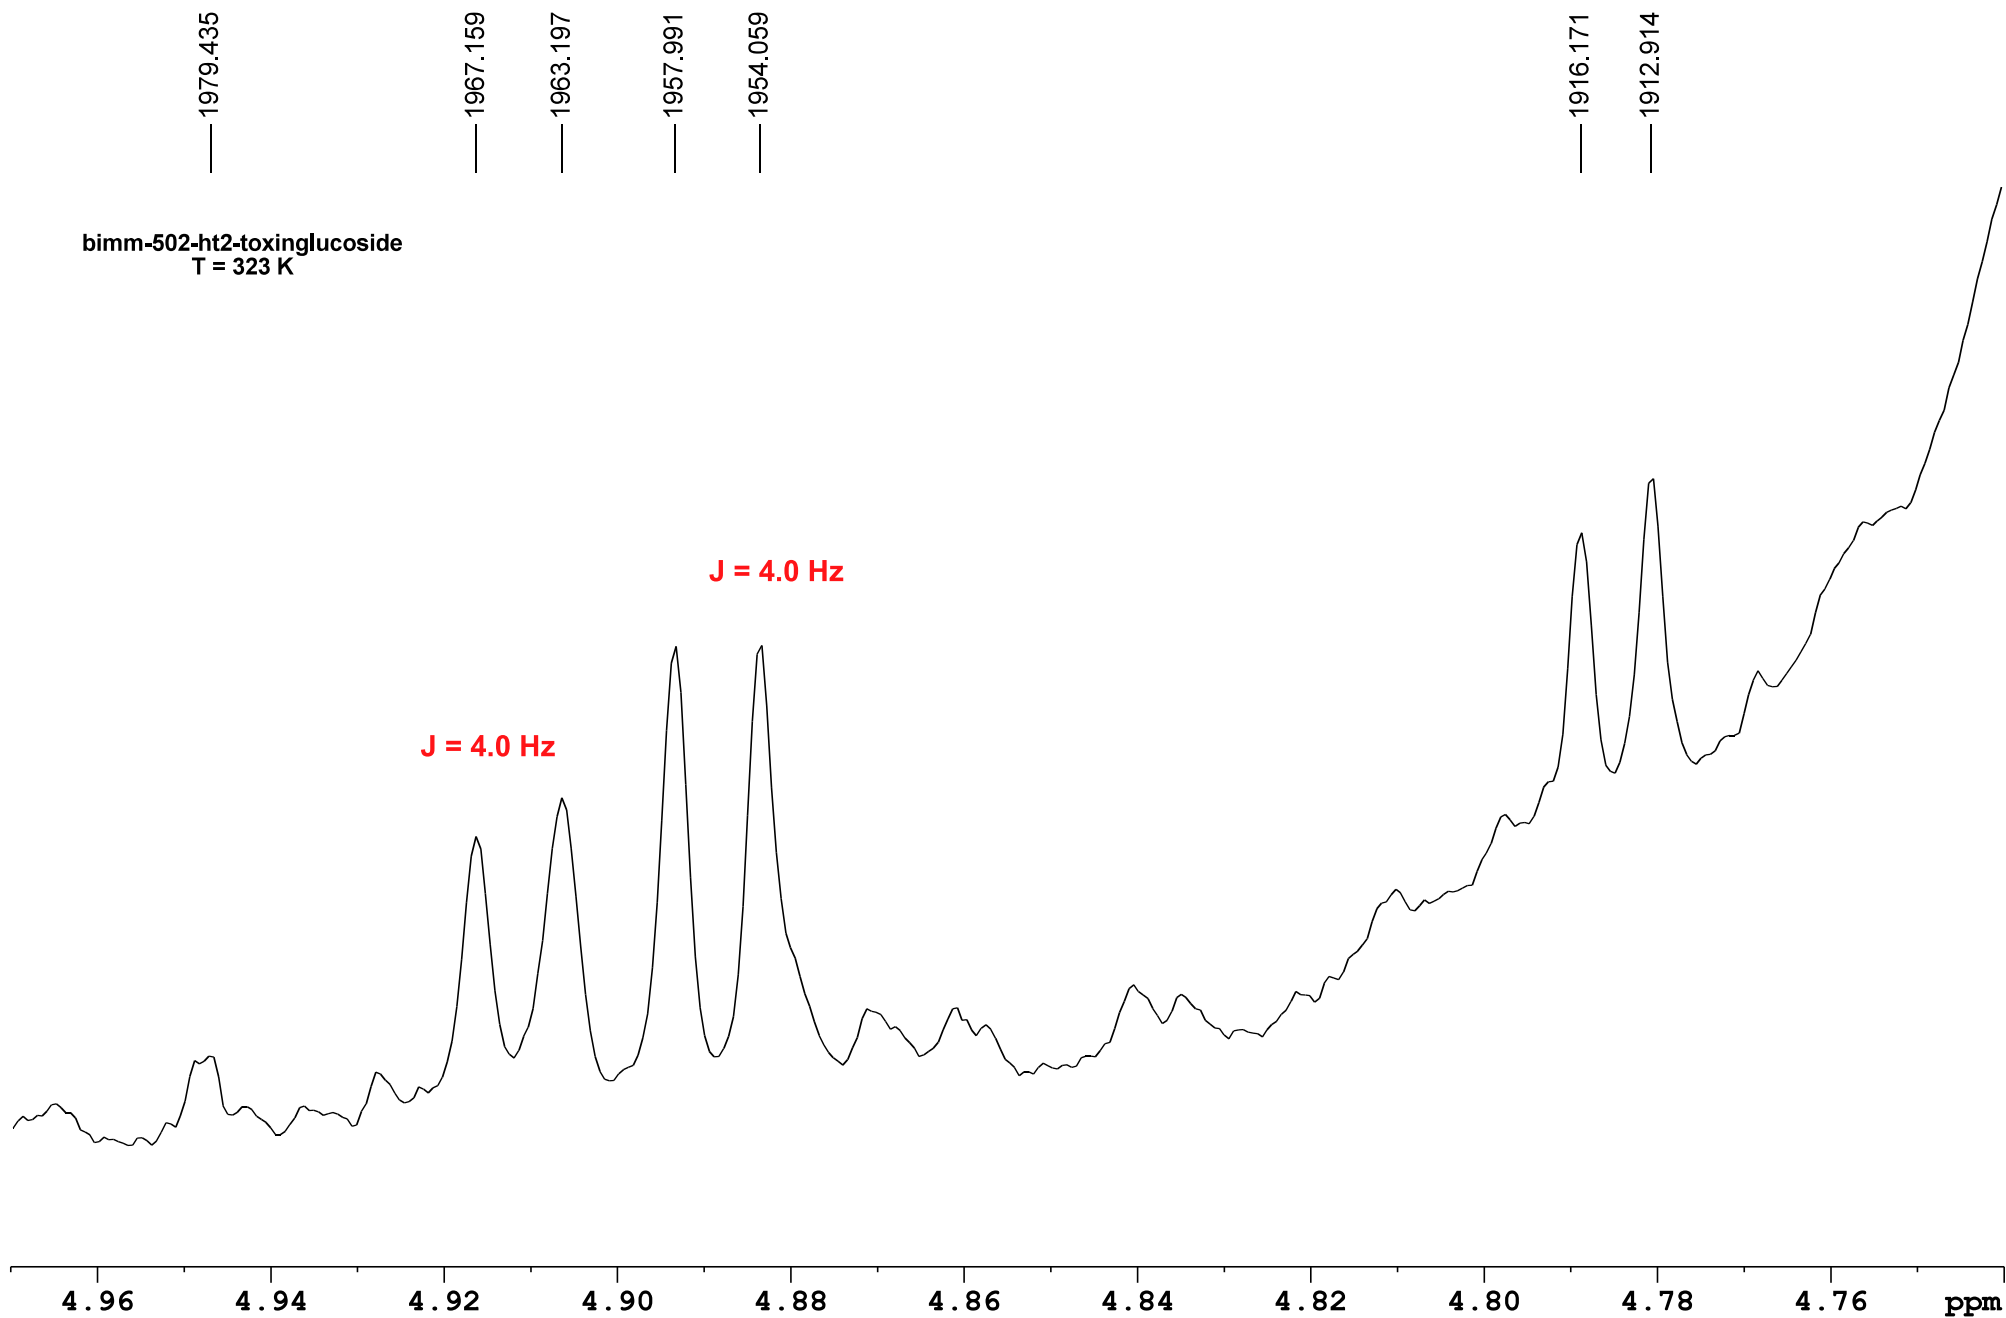

bimm-502-ht2-toxinglucoside  
edited gs-HSQC

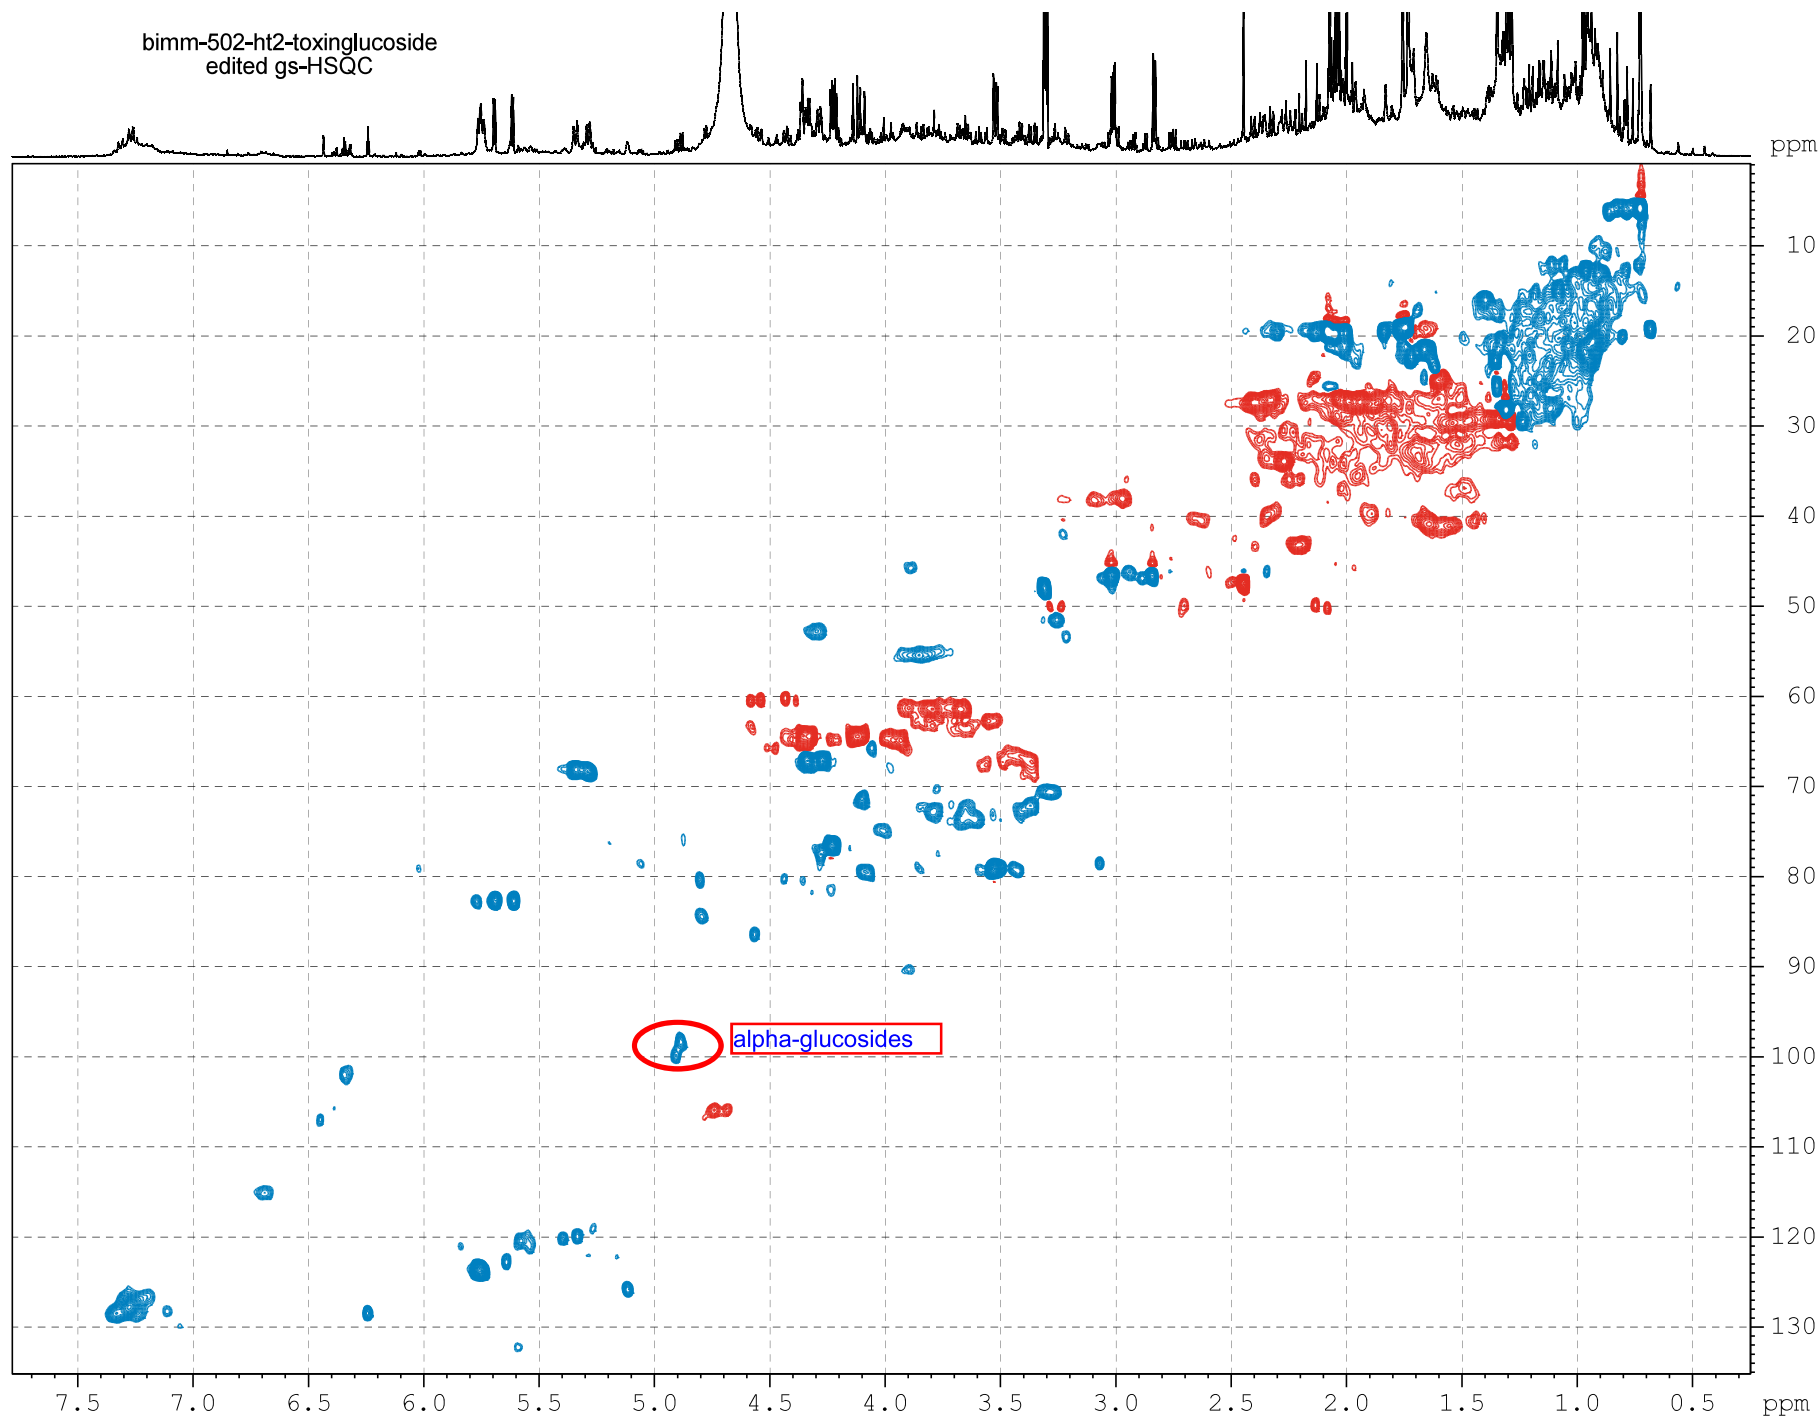

Current Data Parameters  
NAME bimm-502-ht2-toxinglucoside  
EXPNO 2  
PROCNO 1

F2 - Acquisition Parameters  
Date\_ 20231025  
Time 15.35  
INSTRUM spect  
PROBHD 5 mm CPPBBO BB  
PULPROG hsqcetgpgsp.3  
TD 1024  
SOLVENT MeOD  
NS 8  
DS 16  
SWH 4795.396 Hz  
FIDRES 4.683004 Hz  
AQ 0.1067691 sec  
RG 2050  
DW 104.267 usec  
DE 10.00 usec  
TE 303.0 K  
CNST2 145.0000000  
D0 0.00000300 sec  
D1 1.00000000 sec  
D4 0.00172414 sec  
D11 0.03000000 sec  
D16 0.00020000 sec  
D21 0.00360000 sec  
IN0 0.00003310 sec

===== CHANNEL f1 =====  
SFO1 400.1324008 MHz  
NUC1 1H  
P1 11.77 usec  
P2 23.54 usec  
P28 1000.00 usec  
PLW1 9.00000000 W

===== CHANNEL f2 =====  
SFO2 100.6203150 MHz  
NUC2 13C  
CPDPRG2 garp  
P3 10.20 usec  
P14 500.00 usec  
P31 2119.00 usec  
PCPD2 65.00 usec  
PLW0 0 W  
PLW2 32.00000000 W  
PLW12 0.78799999 W  
SPNAM[3] Crp60.0.5.20.1  
SPOAL3 0.500  
SPOFFS3 0 Hz  
SPW3 5.08680010 W  
SPNAM[18] Crp60\_xfil.2  
SPOAL18 0.500  
SPOFFS18 0 Hz  
SPW18 0.97992998 W

===== GRADIENT CHANNEL =====  
GPNAM[1] SMSQ10.100  
GPNAM[2] SMSQ10.100  
GPZ1 80.00 %  
GPZ2 20.10 %  
P16 1000.00 usec

F1 - Acquisition parameters  
TD 128  
SFO1 100.6203 MHz  
FIDRES 236.027191 Hz  
SW 150.126 ppm  
FnMODE Echo-Antiecho

F2 - Processing parameters  
SI 2048  
SF 400.1300094 MHz  
WDW QSINE  
SSB 2  
LB 0 Hz  
GB 0  
PC 1.40

F1 - Processing parameters  
SI 1024  
MC2 echo-antiecho  
SF 100.6127690 MHz  
WDW QSINE  
SSB 2  
LB 0 Hz  
GB 0

bimm-502-ht2-toxinglucoside  
edited gs-HSQC

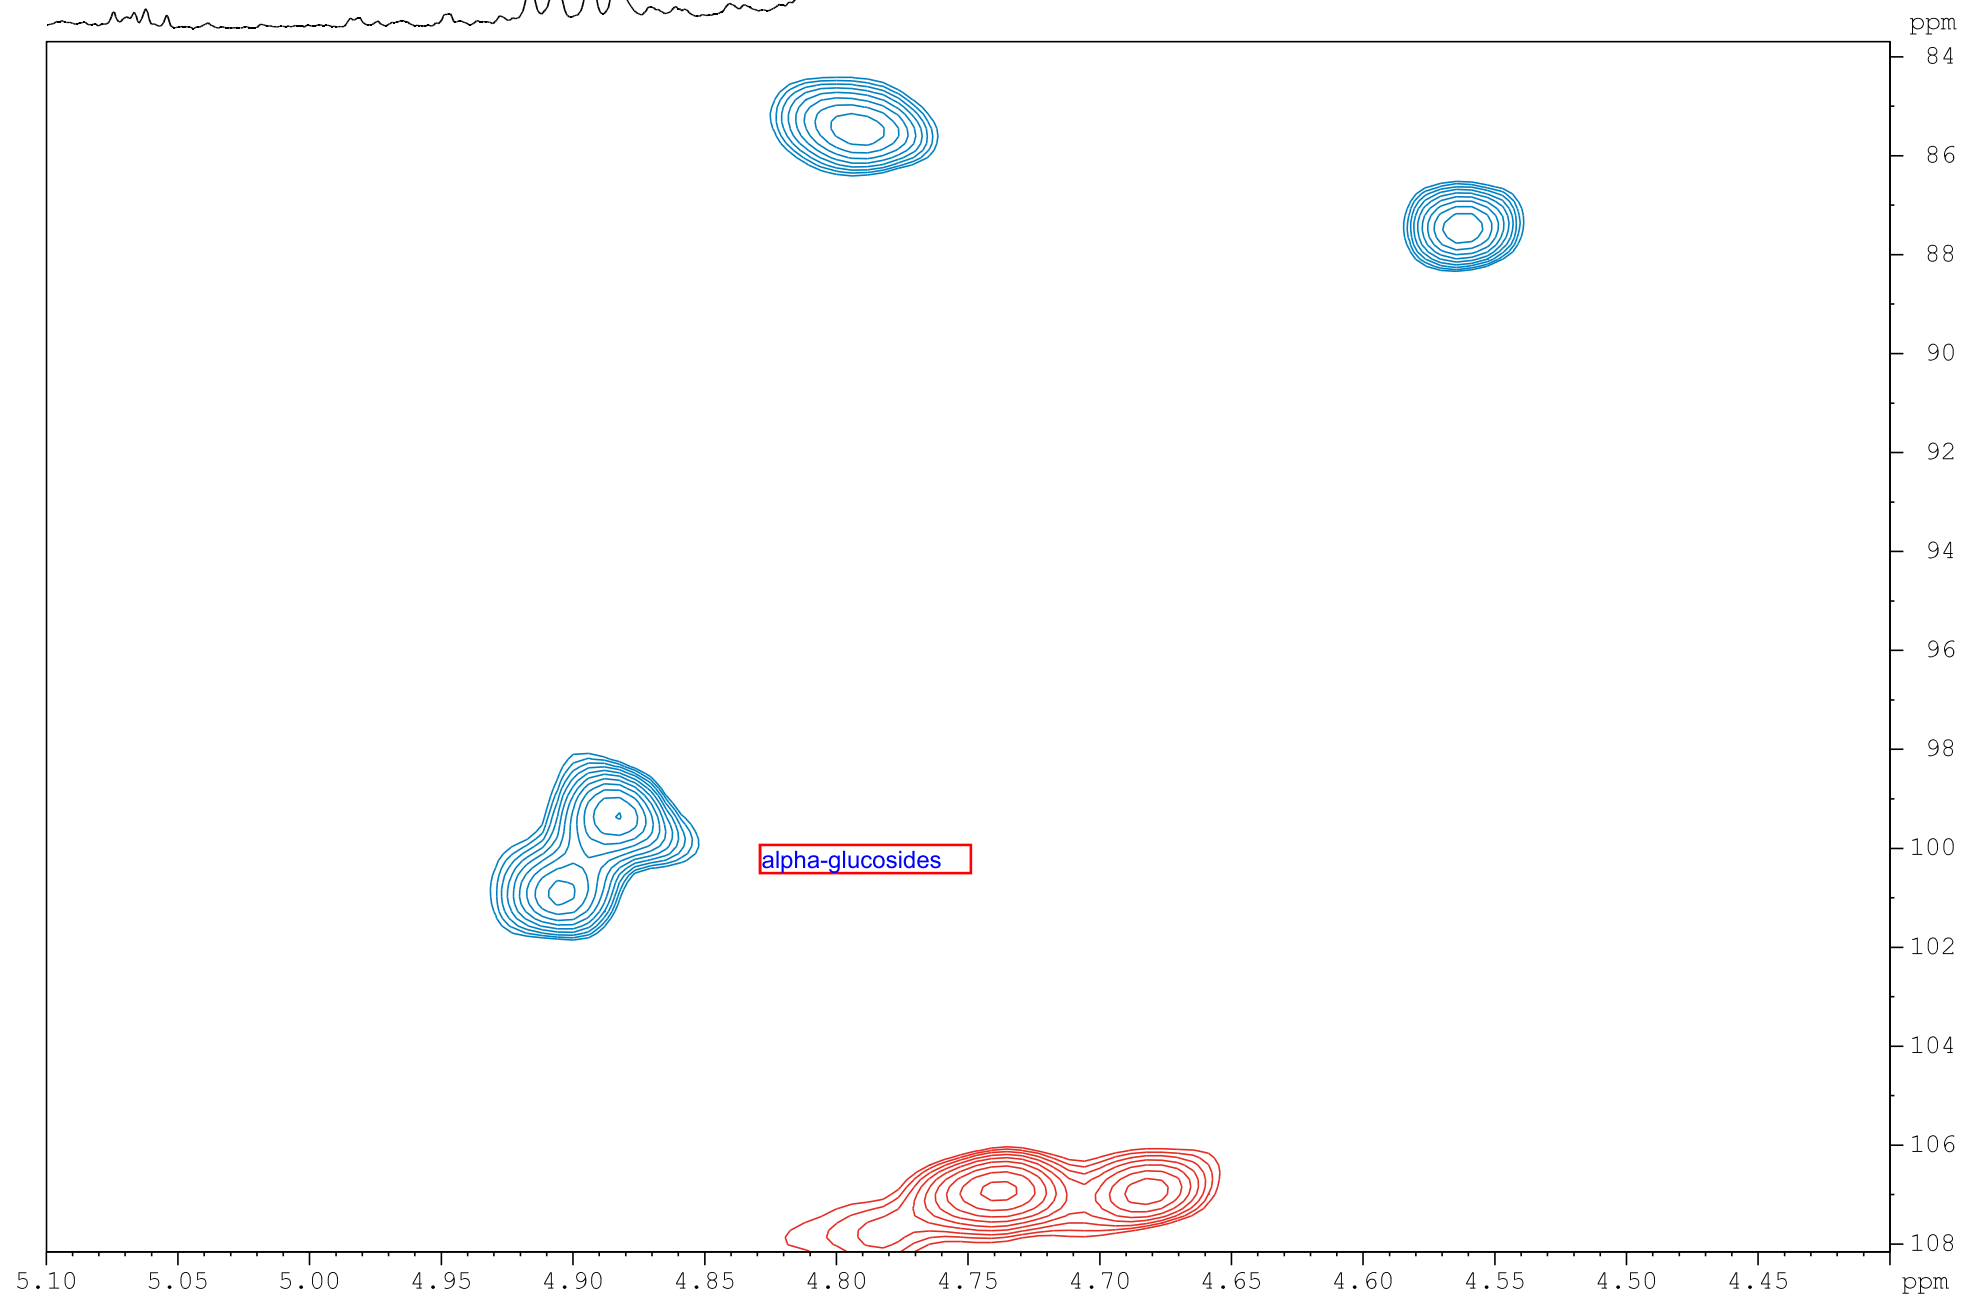

Supplement: s1 [file s1]
