# Supplementary figures and images for: Fusarium sporotrichioides Produces Two HT-2-α-Glucosides on Rice
Source: MDPI journal article supplement (doi:10.3390/toxins16020099), 2024-02-10

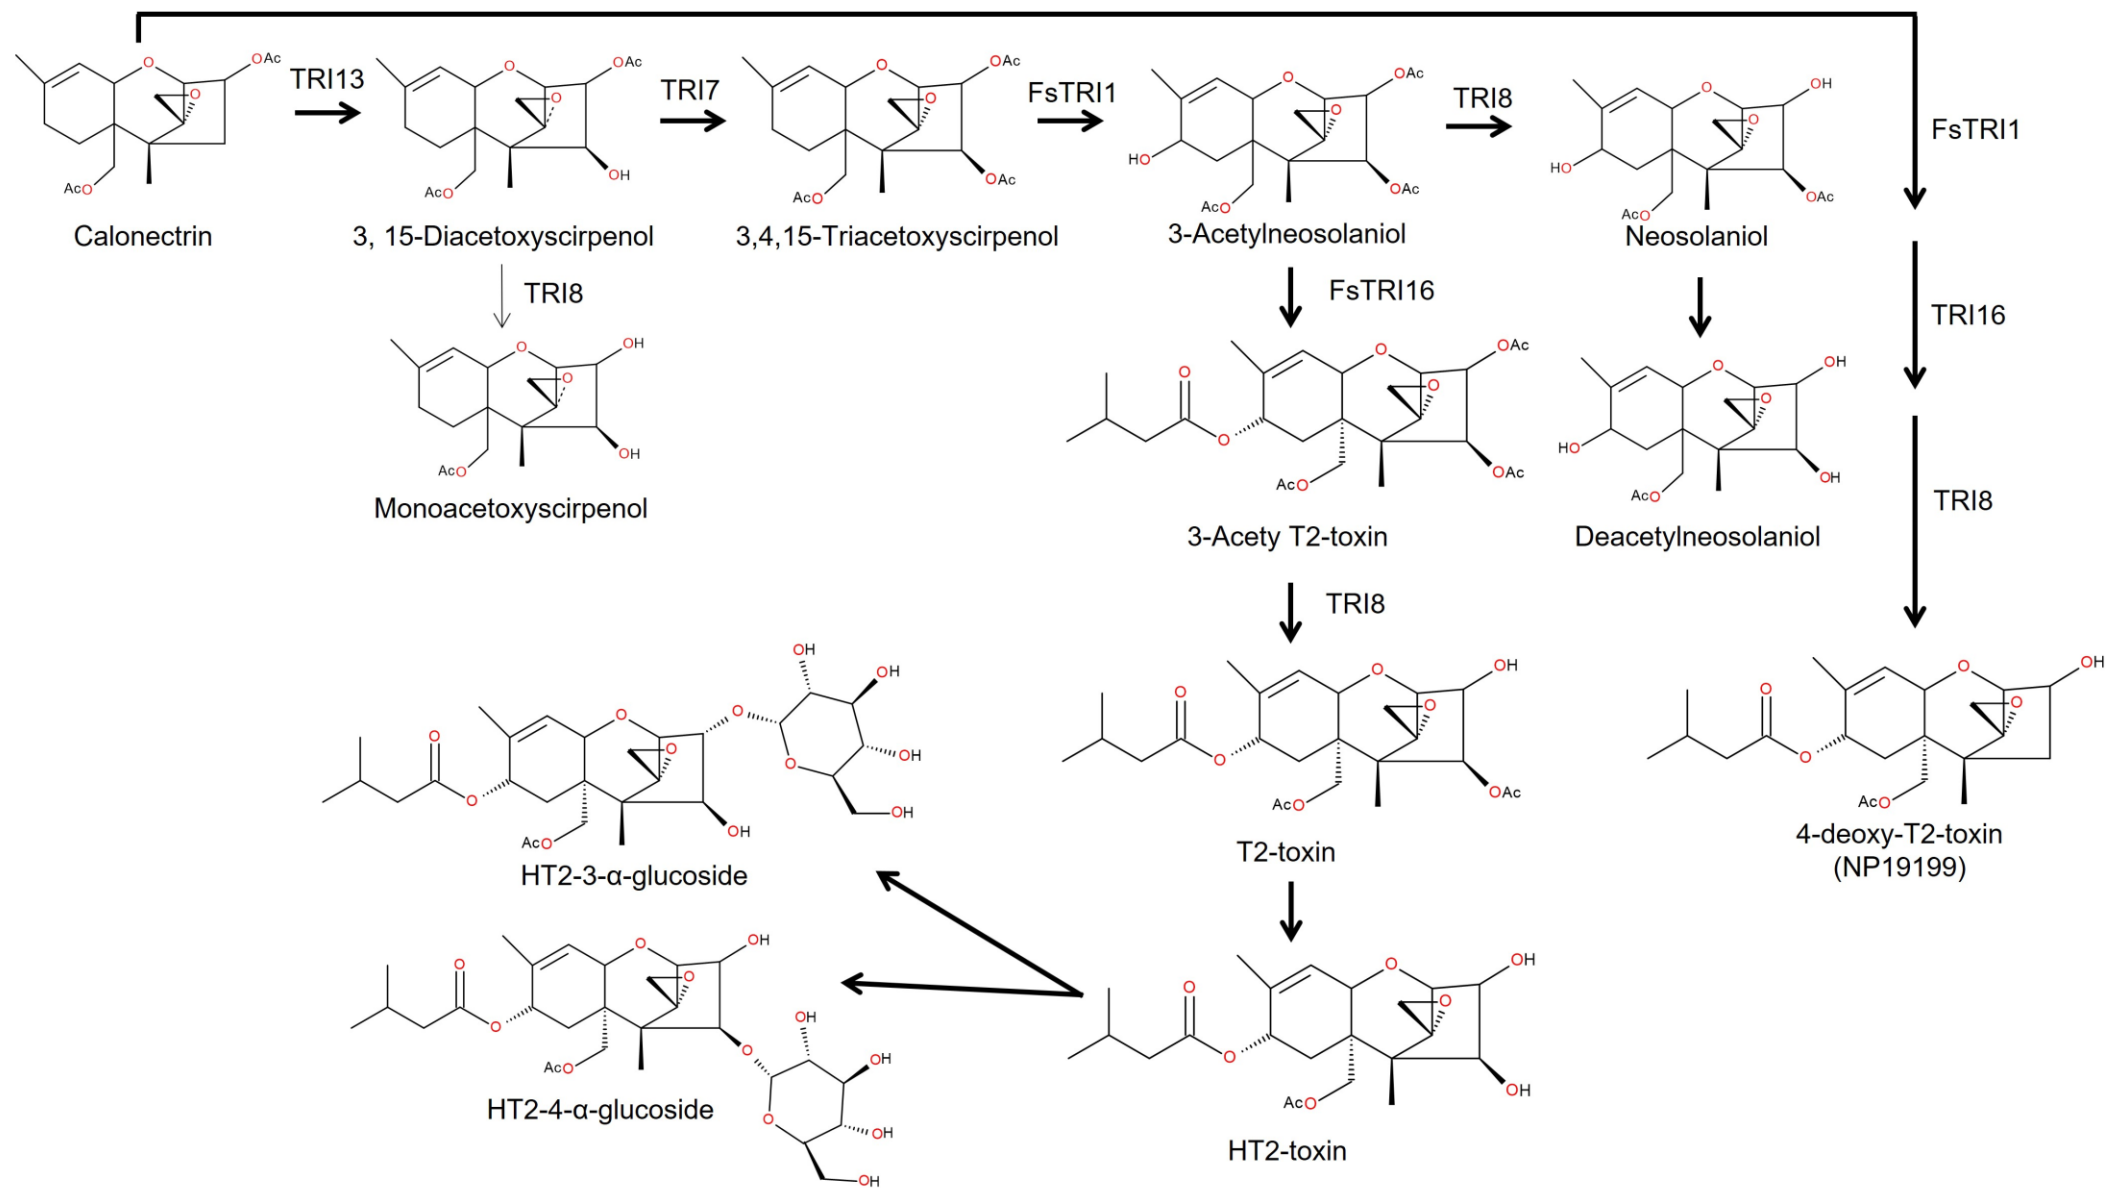

Fig. S1

Supplement: s1 [file s1]
